# Supplementary material for: UV-curable alkyd coating with self-healing ability
Source: Springer Nature journal article supplement (doi:10.1007/s11998-018-0124-x), 2018-09-04
Supplement: MOESM1 [file 16101306]

**Supplementary material**


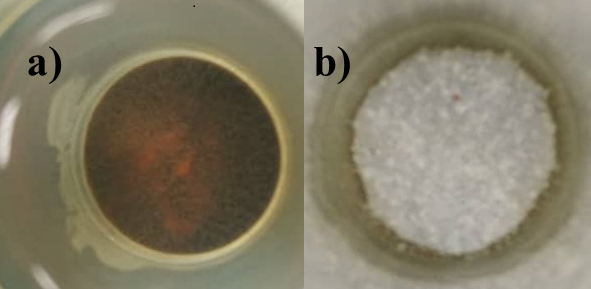


Supplementary data : Image of coatings for EIS experiment after 14 days of immersion with electrochemical attached onto the coating (a) alkyd coating, (b) self-healing coating
